# Supplementary material
Source: ML conference proceedings conference paper supplement (https://www.ecva.net/papers/eccv_2022/papers_ECCV/html/136930121_ECCV_2022_paper.php)
Supplement: Supplementary file 2 [file 136930121-supp.zip]

## Appendix

In this supplemental material, we show additional results on the downstream task of 3D instance segmentation and the extended benchmark of ScanNet200 in Sec. 9. We additionally provide further ablation analysis in Sec. 7 on the effect of the pretrained language model and distance metric used in the contrastive objective of the point-to-language features. Finally, we present a break-down of per-class IoU scores in Sec. 10.

## 7 Additional Ablations

*Generalization across backbone sizes.* In Table 3, we evaluate our approach and baselines using a smaller 20M parameter 3D backbone model. In this scenario, we do not map 3D features directly to their 512-dimensional text embeddings from CLIP but a 96-dimensional projection (obtained by PCA). We see consistent improvements from training from scratch as well as over state of the art while using a smaller-backbone architecture.

|             | mIoU         |              |             |              | Precision    |              |              |              | Recall       |              |              |              |
|-------------|--------------|--------------|-------------|--------------|--------------|--------------|--------------|--------------|--------------|--------------|--------------|--------------|
|             | Head         | Common       | Tail        | All          | Head         | Common       | Tail         | All          | Head         | Common       | Tail         | All          |
| Scratch     | 45.50        | 13.64        | 3.41        | 20.78        | 66.89        | 55.69        | 23.30        | 48.62        | 57.59        | 19.12        | 5.83         | 27.78        |
| Ins. samp.  | 47.70        | 14.40        | 5.33        | 22.48        | 69.01        | 58.71        | 36.33        | 54.68        | 59.95        | 51.75        | 13.07        | 31.59        |
| Weighted CE | 46.99        | 16.72        | 6.24        | 23.25        | 67.33        | 62.15        | 35.62        | 55.03        | 59.76        | 23.69        | 12.58        | 31.80        |
| Focal [29]  | 48.31        | 15.43        | 4.61        | 22.78        | 66.92        | 62.68        | 24.95        | 51.52        | 58.22        | 22.86        | 9.87         | 30.31        |
| C-Focal     | 46.47        | 17.15        | <b>9.45</b> | 24.29        | 66.27        | 60.24        | 38.25        | 54.92        | 59.47        | 23.25        | 16.27        | 32.90        |
| CSC [20]    | 48.51        | 16.29        | 5.88        | 23.49        | <b>70.99</b> | 62.16        | 29.35        | 54.16        | 60.47        | 21.31        | 9.46         | 30.19        |
| <b>Ours</b> | <b>48.88</b> | <b>19.97</b> | 9.03        | <b>25.93</b> | 68.77        | <b>65.36</b> | <b>42.33</b> | <b>58.82</b> | <b>61.34</b> | <b>27.75</b> | <b>19.11</b> | <b>35.49</b> |

Table 3: Generalization across backbone sizes: 3D semantic segmentation with a 20M parameter 3D U-Net backbone on ScanNet200. Our approach maintains consistent improvements over state of the art with this smaller 3D backbone.

*Comparison with point-based baselines* As an additional ablation we compare our method with point-based state-of-the-art segmentation models capable of processing complete ScanNet scenes at once. We choose RandLa-Net [22] and SCF-Net [14] as baselines and use the official authors implementation and hyper-parameters for both methods. Our method outperforms both approaches with our language-guided pretraining on this challenging large-vocabulary task. The performance evaluated on ScanNet200 can be seen in Table 4.

*Effect of contrastive distance metric.* Table 5 additionally considers alternative distance metrics of  $\ell_1$  and  $\ell_2$  in comparison with our used cosine distance metric. The  $\ell_1$  and  $\ell_2$  distances were more challenging to optimize to align to corresponding text embeddings, with cosine distance producing the best performance.

|             | Head         | Common       | Tail         | Mean         |
|-------------|--------------|--------------|--------------|--------------|
| RandLA-Net  | 35.35        | 5.15         | 0.87         | 15.06        |
| SCF-Net     | 35.99        | 5.97         | 0.38         | 15.45        |
| <b>Ours</b> | <b>51.51</b> | <b>22.68</b> | <b>12.41</b> | <b>28.87</b> |

Table 4: Comparison with point-based RandLA-Net and SCF-Net on ScanNet200 semantic segmentation (mIoU).

*Effect of the pre-trained language model.* In Table 5, we consider alternative language models to CLIP [43]; both BERT [12] and GPT2 [44] are also popular language models trained on large amounts of text data, rather than the image-text training of CLIP.

For text encodings, we use the BERT variant *bert\_uncased\_L-8\_H-512\_A-8* from [49], and project the 768-dimensional GPT2 encodings from the small GPT2 model to 512 dimensions by PCA. We find the rich embedding structure from the multi-modal nature of CLIP produces the best results.

|                    | mIoU         |              |              |              | Precision    |              |              |              | Recall       |              |              |              |
|--------------------|--------------|--------------|--------------|--------------|--------------|--------------|--------------|--------------|--------------|--------------|--------------|--------------|
|                    | Head         | Common       | Tail         | All          | Head         | Common       | Tail         | All          | Head         | Common       | Tail         | All          |
| Scratch            | 48.29        | 19.08        | 7.86         | 25.02        | 68.81        | 66.29        | 39.88        | 33.67        | 60.45        | 25.50        | 15.06        | 33.67        |
| GPT2 [44]          | 45.70        | 19.07        | 9.73         | 24.78        | 69.42        | 66.18        | 48.76        |              | 56.86        | 25.132       | 16.75        | 32.41        |
| BERT [12]          | 47.70        | 18.19        | 9.16         | 24.95        | 70.48        | 64.09        | 42.16        |              | 58.24        | 24.01        | 16.19        | 32.65        |
| BERT $\ell_2$      | 41.16        | 14.02        | 8.89         | 21.28        | 67.82        | 61.65        | 39.38        |              | 53.90        | 19.86        | 13.72        | 20.77        |
| CLIP [43] $\ell_1$ | 39.28        | 10.26        | 2.80         | 17.38        | 64.52        | 57.64        | 27.57        |              | 48.81        | 14.09        | 3.95         | 22.29        |
| CLIP $\ell_2$      | 43.48        | 16.97        | 8.87         | 23.04        | 67.15        | 64.64        | 41.54        |              | 54.50        | 22.07        | 14.77        | 29.92        |
| CLIP               | <b>50.39</b> | <b>22.84</b> | <b>10.10</b> | <b>27.73</b> | <b>71.64</b> | <b>69.72</b> | <b>44.47</b> | <b>42.67</b> | <b>62.20</b> | <b>29.37</b> | <b>17.35</b> | <b>36.16</b> |

Table 5: Ablation study on different language models for generating the text anchors during the pre-training stage. We show that while the model benefited from pretraining guided by all language models, CLIP was found to be the most suitable for this task. We also show that more rigid loss distance metrics such as  $l_1$  or  $l_2$  can even significantly hinder the performance.

## 8 Implementation Details

**Training parameters** In the pretraining stage, we use a momentum SGD optimizer with batch size 8 and an initial learning rate of 0.05, decayed by a factor of 0.3 at epochs 150 and 250, a momentum of 0.9, and train for 400 epochs until convergence. We additionally use  $\lambda = 1$ ,  $t_{pos} = 0$ ,  $t_{neg} = 0.6$  and  $N_i = 3$  uniformly sampled from all ScanNet200 categories.

We then fine-tune the pre-trained 3D backbone for 3D semantic segmentation. We optimize with the same momentum SGD and batch size, with an initial learning rate of 0.05, decayed by a factor of 0.3, and train for 170 epochs until

convergence. For the instance sampling, we sampled from the 66 classes least frequently represented in the training set surface point annotations.

**Instance Sampling** For the instance sampling, we randomly sample from the 66 tail classes, and select them by probability computed from the inverse log frequencies of the train set histogram. Object centers are placed in the scene by randomly sampling  $(x, y)$  locations in the scene, with  $z$  determined by the max height of the scene geometry at  $(x, y)$  (such that the object sits on the scene geometry). Objects are then inserted with a random orientation around the up ( $z$ ) axis. Any object insertion that induces a bounding box collision with scene objects or previously inserted objects are discarded. Placement determined by object center on the support plane encourages placement of instances with sufficient physical support in the scene. In combination with color and geometry augmentation, this helps to learn more robust features in our large-vocabulary setting.

We also note here that while we do not explicitly address lighting effects during instance augmentation, a minor appearance difference is noticeable on the original and sampled parts of the scene, we still achieve a clear effect with this augmentation technique. We hypothesize that at the 2cm resolution which our method (and state-of-the-art methods) use, lighting inconsistencies have a limited-to-negligible effect. In addition, we use random color jittering, which reduces the chance of learning from erroneous signal, and observe that the advantage of this geometric augmentation provides notably more benefit than color. We provide evidence of our reasoning with an experiment to train the same baseline sparse 20M parameter UNet model with and without voxel color signal, and observed that the final performance differs only in 1% mIoU.

## 9 3D Instance Segmentation Results

Figure 8 shows qualitative visualizations for the downstream task of 3D instance segmentation in comparison to training from scratch and CSC [20].

## 10 Breakdown of Class IoU scores

Table 6 shows the per-category IoU scores for 3D semantic segmentation on ScanNet200.

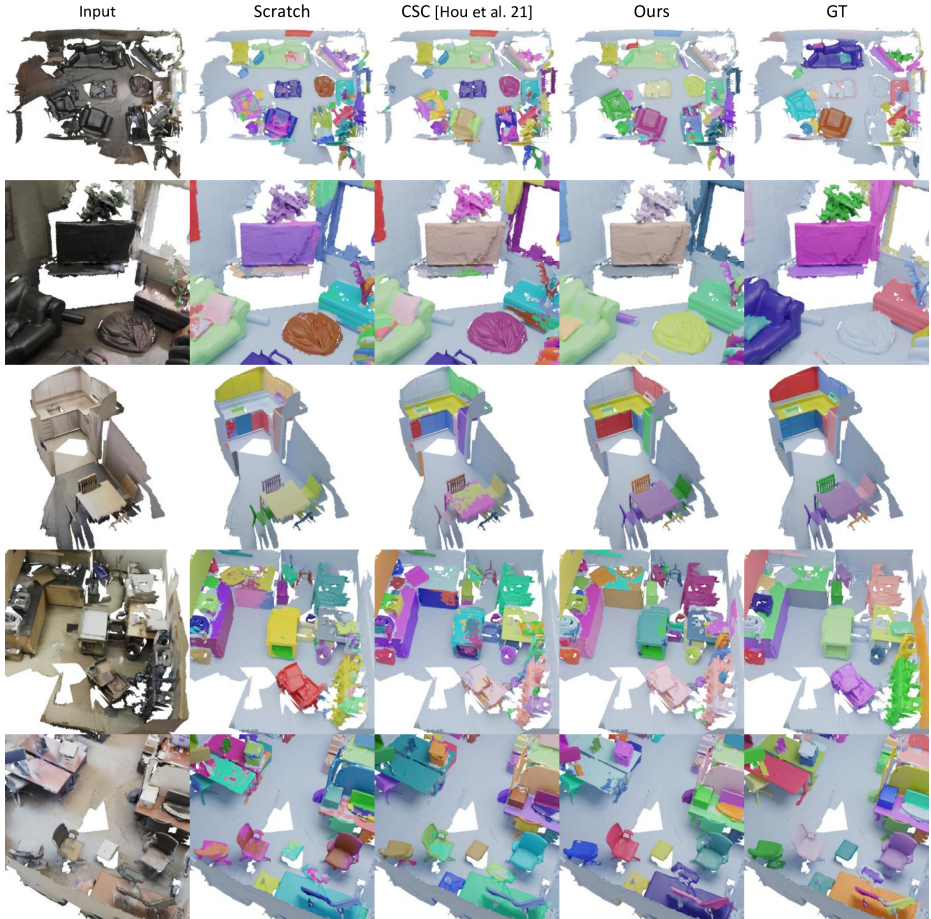

Fig. 8: Qualitative results for 3D semantic instance segmentation results on Scan-Net [10] scenes. Our language-grounded pretraining together with class-balanced losses can also effectively improve performance in object recognition.

| Class IoU             |         |              |         |       |               |           |       |
|-----------------------|---------|--------------|---------|-------|---------------|-----------|-------|
| Categories            | Scratch | Inst. Sampl. | C-Focal | CSC   | CSC + C-Focal | Ours - CE | Ours  |
| wall                  | 77.25   | 77.05        | 76.02   | 77.64 | 76.71         | 78.15     | 78.66 |
| chair                 | 75.06   | 76.22        | 75.84   | 72.59 | 75.85         | 71.44     | 76.54 |
| floor                 | 95.41   | 95.24        | 95.19   | 95.45 | 95.25         | 95.41     | 95.42 |
| table                 | 64.21   | 66.77        | 65.32   | 65.23 | 65.67         | 64.68     | 64.92 |
| door                  | 62.57   | 63.52        | 59.91   | 62.15 | 59.11         | 64.35     | 62.78 |
| couch                 | 80.96   | 82.82        | 81.72   | 80.60 | 79.21         | 82.18     | 83.23 |
| cabinet               | 31.73   | 34.56        | 32.82   | 34.78 | 32.84         | 36.74     | 34.24 |
| shelf                 | 44.79   | 37.31        | 39.48   | 38.87 | 39.40         | 43.57     | 38.80 |
| desk                  | 57.34   | 57.75        | 57.78   | 57.78 | 56.62         | 59.78     | 58.90 |
| office chair          | 1.12    | 4.57         | 5.56    | 16.75 | 3.75          | 18.43     | 1.16  |
| bed                   | 79.04   | 78.60        | 78.79   | 77.80 | 78.97         | 79.97     | 79.78 |
| pillow                | 49.36   | 48.88        | 49.70   | 52.24 | 51.47         | 53.13     | 51.93 |
| sink                  | 63.43   | 63.73        | 64.17   | 63.71 | 64.21         | 64.80     | 64.62 |
| picture               | 29.53   | 27.49        | 25.53   | 31.03 | 32.20         | 30.71     | 33.63 |
| window                | 54.05   | 55.95        | 53.69   | 54.91 | 55.66         | 59.47     | 59.40 |
| toilet                | 88.24   | 88.92        | 90.20   | 89.53 | 89.86         | 92.78     | 92.26 |
| bookshelf             | 53.84   | 48.79        | 50.93   | 51.05 | 48.23         | 50.32     | 52.04 |
| monitor               | 80.20   | 79.93        | 80.85   | 83.71 | 81.96         | 84.94     | 85.81 |
| curtain               | 70.93   | 66.02        | 68.70   | 71.04 | 68.47         | 70.23     | 69.90 |
| book                  | 37.53   | 40.49        | 39.39   | 20.42 | 32.46         | 39.50     | 26.01 |
| armchair              | 47.67   | 52.60        | 57.08   | 54.08 | 50.58         | 53.05     | 52.31 |
| coffee table          | 66.09   | 66.52        | 70.13   | 63.88 | 63.61         | 64.70     | 65.04 |
| box                   | 22.25   | 24.98        | 21.38   | 22.50 | 24.65         | 20.77     | 23.88 |
| refrigerator          | 67.48   | 64.92        | 56.49   | 68.95 | 58.80         | 69.89     | 65.83 |
| lamp                  | 65.61   | 60.48        | 60.96   | 69.75 | 67.51         | 69.10     | 69.02 |
| kitchen cabinet       | 67.25   | 66.36        | 63.67   | 60.97 | 61.87         | 62.13     | 61.39 |
| towel                 | 34.45   | 40.68        | 39.90   | 38.95 | 40.33         | 49.51     | 43.77 |
| clothes               | 13.33   | 13.55        | 13.10   | 15.17 | 14.78         | 15.98     | 17.20 |
| tv                    | 80.26   | 78.17        | 81.30   | 85.57 | 81.30         | 84.45     | 87.15 |
| nightstand            | 65.93   | 70.83        | 64.54   | 63.64 | 68.46         | 68.27     | 69.17 |
| counter               | 23.56   | 24.29        | 23.95   | 21.12 | 21.70         | 25.78     | 26.59 |
| dresser               | 37.64   | 33.10        | 35.06   | 32.65 | 38.64         | 37.31     | 39.46 |
| stool                 | 36.03   | 30.45        | 34.84   | 43.21 | 46.42         | 49.54     | 56.44 |
| cushion               | 0.00    | 0.00         | 0.00    | 0.00  | 0.00          | 0.00      | 0.00  |
| plant                 | 68.54   | 73.90        | 68.58   | 65.83 | 66.67         | 71.15     | 70.80 |
| ceiling               | 91.50   | 91.00        | 90.95   | 91.53 | 91.25         | 91.70     | 91.70 |
| bathub                | 81.30   | 79.60        | 80.90   | 78.29 | 81.58         | 81.69     | 80.35 |
| end table             | 21.13   | 15.36        | 19.06   | 15.38 | 24.01         | 24.01     | 16.48 |
| dining table          | 3.91    | 2.29         | 5.35    | 4.43  | 3.10          | 5.65      | 0.00  |
| keyboard              | 25.37   | 27.32        | 32.18   | 33.81 | 34.60         | 32.22     | 36.64 |
| bag                   | 16.12   | 12.25        | 12.89   | 15.25 | 9.24          | 12.69     | 12.77 |
| backpack              | 53.09   | 50.68        | 50.62   | 56.73 | 53.58         | 57.40     | 57.91 |
| toilet paper          | 30.46   | 35.51        | 33.94   | 36.52 | 36.28         | 39.81     | 40.65 |
| printer               | 37.01   | 35.76        | 35.69   | 29.67 | 29.06         | 29.57     | 29.48 |
| tv stand              | 62.72   | 58.32        | 66.17   | 69.72 | 70.78         | 61.92     | 67.01 |
| whiteboard            | 42.60   | 42.39        | 42.29   | 45.04 | 47.14         | 46.55     | 48.66 |
| blanket               | 0.46    | 1.14         | 0.41    | 0.61  | 0.53          | 0.10      | 1.22  |
| shower curtain        | 60.80   | 58.01        | 61.96   | 63.04 | 58.72         | 67.85     | 65.64 |
| trash can             | 57.87   | 56.73        | 58.29   | 57.74 | 54.44         | 59.26     | 61.34 |
| closet                | 10.25   | 7.91         | 9.19    | 15.48 | 9.84          | 7.27      | 11.18 |
| stairs                | 55.36   | 52.20        | 64.29   | 49.02 | 58.42         | 49.42     | 65.48 |
| microwave             | 33.50   | 40.70        | 37.09   | 42.85 | 45.46         | 35.98     | 40.17 |
| stove                 | 59.17   | 64.41        | 59.30   | 61.99 | 59.04         | 65.18     | 65.11 |
| shoe                  | 46.30   | 38.29        | 38.85   | 43.23 | 38.72         | 44.52     | 47.49 |
| computer tower        | 46.53   | 49.50        | 50.28   | 47.87 | 48.51         | 52.96     | 52.33 |
| bottle                | 2.34    | 6.04         | 6.87    | 6.97  | 8.16          | 15.35     | 7.14  |
| bin                   | 0.00    | 0.00         | 0.00    | 0.00  | 0.00          | 0.00      | 0.00  |
| ottoman               | 40.04   | 52.73        | 55.30   | 44.97 | 37.31         | 44.62     | 50.21 |
| bench                 | 39.98   | 41.57        | 33.65   | 36.34 | 38.44         | 49.73     | 52.76 |
| board                 | 7.83    | 10.11        | 7.58    | 11.91 | 16.13         | 13.33     | 11.03 |
| washing machine       | 79.11   | 85.10        | 85.86   | 81.02 | 80.65         | 86.72     | 80.11 |
| mirror                | 28.55   | 30.91        | 32.10   | 29.13 | 33.40         | 35.18     | 35.78 |
| copier                | 75.21   | 79.77        | 83.45   | 88.28 | 67.01         | 86.83     | 88.15 |
| basket                | 0.00    | 0.00         | 0.00    | 0.00  | 0.00          | 0.00      | 2.84  |
| sofa chair            | 21.73   | 21.48        | 27.32   | 21.82 | 24.09         | 37.55     | 36.05 |
| file cabinet          | 37.87   | 31.78        | 34.34   | 29.64 | 35.37         | 33.58     | 32.88 |
| fan                   | 24.39   | 31.70        | 21.03   | 27.47 | 17.05         | 21.23     | 31.02 |
| laptop                | 33.13   | 34.29        | 26.23   | 36.11 | 41.85         | 44.69     | 43.09 |
| shower                | 16.71   | 20.08        | 20.80   | 17.42 | 20.67         | 18.93     | 32.82 |
| paper                 | 4.30    | 3.76         | 14.32   | 3.79  | 12.09         | 2.45      | 5.84  |
| person                | 9.98    | 15.85        | 18.03   | 12.09 | 13.91         | 17.42     | 24.42 |
| paper towel dispenser | 41.18   | 37.18        | 32.59   | 39.04 | 37.99         | 37.70     | 41.58 |
| oven                  | 1.42    | 0.03         | 0.00    | 2.86  | 1.01          | 4.91      | 0.21  |
| blinds                | 0.44    | 1.07         | 1.42    | 0.62  | 3.01          | 0.53      | 3.09  |
| rack                  | 0.00    | 0.00         | 0.00    | 0.00  | 0.00          | 0.00      | 0.00  |
| plate                 | 0.00    | 0.00         | 0.00    | 0.00  | 0.00          | 0.00      | 0.00  |
| blackboard            | 48.93   | 53.86        | 49.19   | 53.71 | 48.87         | 50.76     | 53.02 |
| piano                 | 38.68   | 54.40        | 58.86   | 47.77 | 48.06         | 10.02     | 24.04 |
| suitcase              | 46.43   | 46.78        | 41.31   | 61.56 | 51.55         | 57.09     | 57.84 |
| rail                  | 0.30    | 2.58         | 1.46    | 2.57  | 1.17          | 1.93      | 1.15  |
| radiator              | 50.56   | 50.60        | 47.42   | 52.29 | 50.40         | 55.45     | 54.24 |
| recycling bin         | 30.10   | 28.50        | 27.01   | 34.03 | 30.09         | 33.41     | 39.05 |
| container             | 0.00    | 9.20         | 9.53    | 0.00  | 15.11         | 0.00      | 0.00  |
| wardrobe              | 12.12   | 9.95         | 12.63   | 8.56  | 11.76         | 15.69     | 24.51 |
| soap dispenser        | 61.76   | 62.38        | 61.20   | 56.99 | 65.05         | 64.95     | 70.48 |
| telephone             | 18.38   | 17.62        | 21.03   | 16.54 | 18.00         | 20.55     | 22.54 |
| bucket                | 20.12   | 20.67        | 25.95   | 19.55 | 21.12         | 24.02     | 22.04 |
| clock                 | 4.88    | 9.96         | 13.88   | 11.52 | 18.17         | 17.51     | 26.48 |
| stand                 | 0.04    | 0.90         | 0.00    | 0.00  | 0.13          | 0.00      | 0.00  |
| light                 | 1.91    | 0.49         | 3.16    | 19.11 | 16.25         | 12.21     | 7.67  |
| laundry basket        | 1.42    | 1.47         | 0.00    | 5.46  | 4.35          | 1.27      | 0.20  |
| pipe                  | 3.52    | 1.99         | 1.92    | 1.17  | 0.61          | 1.09      | 1.98  |
| clothes dryer         | 14.32   | 7.40         | 0.67    | 41.58 | 29.33         | 4.77      | 52.12 |
| guitar                | 0.00    | 13.04        | 0.00    | 29.25 | 26.05         | 8.02      | 1.78  |
| toilet paper holder   | 0.00    | 0.00         | 0.00    | 0.00  | 0.00          | 0.00      | 4.69  |
| seat                  | 0.00    | 0.00         | 0.00    | 0.00  | 0.00          | 1.62      | 0.00  |
| speaker               | 0.00    | 0.00         | 0.00    | 0.00  | 0.00          | 0.00      | 0.00  |
| column                | 25.80   | 17.91        | 12.24   | 0.00  | 0.64          | 25.89     | 0.68  |

|                             |       |       |       |       |       |       |       |
|-----------------------------|-------|-------|-------|-------|-------|-------|-------|
| bicycle                     | 0.00  | 0.00  | 0.00  | 0.00  | 0.00  | 0.00  | 0.00  |
| ladder                      | 40.67 | 33.61 | 45.94 | 36.88 | 47.83 | 55.96 | 46.14 |
| bathroom stall              | 43.90 | 44.55 | 45.57 | 41.21 | 43.77 | 48.14 | 43.56 |
| shower wall                 | 52.94 | 53.76 | 50.95 | 46.90 | 48.12 | 43.78 | 47.90 |
| cup                         | 10.28 | 12.48 | 14.42 | 14.44 | 16.53 | 21.00 | 14.53 |
| jacket                      | 11.18 | 6.58  | 10.10 | 6.16  | 7.98  | 9.72  | 14.45 |
| storage bin                 | 3.46  | 0.00  | 0.00  | 0.88  | 2.35  | 4.35  | 1.04  |
| coffee maker                | 52.84 | 34.53 | 36.58 | 49.47 | 57.62 | 75.29 | 78.46 |
| dishwasher                  | 5.05  | 7.17  | 19.18 | 11.77 | 22.50 | 21.62 | 28.03 |
| paper towel roll            | 24.18 | 19.22 | 28.64 | 27.99 | 31.98 | 24.73 | 23.16 |
| machine                     | 0.00  | 0.00  | 0.00  | 0.00  | 0.00  | 0.00  | 0.00  |
| mat                         | 6.42  | 0.00  | 8.07  | 0.88  | 10.44 | 7.22  | 10.29 |
| windowsill                  | 14.68 | 23.71 | 17.96 | 16.27 | 19.98 | 15.15 | 21.92 |
| bar                         | 10.21 | 5.71  | 12.57 | 7.74  | 11.44 | 13.73 | 13.26 |
| toaster                     | 1.91  | 6.50  | 8.23  | 0.00  | 0.14  | 0.00  | 0.00  |
| bulletin board              | 7.95  | 2.80  | 10.59 | 13.68 | 17.39 | 19.25 | 27.59 |
| ironing board               | 1.13  | 1.36  | 12.23 | 6.51  | 10.55 | 0.27  | 2.02  |
| fireplace                   | 40.93 | 49.23 | 60.24 | 42.96 | 50.68 | 47.52 | 68.43 |
| soap dish                   | 18.11 | 18.64 | 23.41 | 26.71 | 28.17 | 28.15 | 29.71 |
| kitchen counter             | 50.11 | 39.74 | 42.74 | 32.74 | 32.14 | 38.22 | 42.21 |
| doorframe                   | 34.18 | 29.46 | 33.16 | 36.43 | 33.90 | 40.06 | 40.01 |
| toilet paper dispenser      | 40.43 | 31.76 | 44.93 | 42.89 | 37.10 | 36.93 | 44.52 |
| mini fridge                 | 18.85 | 17.48 | 11.32 | 8.25  | 11.57 | 24.15 | 17.30 |
| fire extinguisher           | 3.45  | 9.75  | 0.12  | 8.79  | 0.37  | 34.88 | 41.51 |
| ball                        | 18.74 | 74.81 | 35.19 | 58.87 | 35.49 | 2.20  | 49.23 |
| hat                         | 0.00  | 0.00  | 0.00  | 0.00  | 0.00  | 0.00  | 0.00  |
| shower curtain rod          | 33.53 | 29.08 | 27.35 | 33.41 | 27.59 | 32.87 | 34.80 |
| water cooler                | 4.73  | 11.66 | 21.04 | 0.36  | 0.00  | 0.00  | 0.00  |
| paper cutter                | 18.60 | 26.97 | 19.93 | 23.51 | 22.60 | 23.45 | 21.58 |
| tray                        | 0.00  | 0.00  | 0.02  | 0.00  | 1.39  | 0.68  | 0.00  |
| shower door                 | 13.86 | 18.79 | 13.46 | 14.71 | 24.77 | 20.34 | 23.26 |
| pillar                      | 0.00  | 0.00  | 0.40  | 0.66  | 0.02  | 0.29  | 0.00  |
| ledge                       | 1.83  | 4.00  | 6.22  | 5.15  | 7.63  | 9.95  | 6.86  |
| toaster oven                | 3.13  | 15.28 | 1.39  | 9.79  | 18.67 | 9.96  | 7.25  |
| mouse                       | 0.00  | 0.00  | 0.00  | 0.00  | 0.00  | 0.00  | 3.18  |
| toilet seat cover dispenser | 42.78 | 45.41 | 61.57 | 43.21 | 62.56 | 64.32 | 58.95 |
| furniture                   | 0.00  | 0.09  | 0.00  | 0.00  | 0.00  | 0.00  | 0.00  |
| cart                        | 21.51 | 29.49 | 14.34 | 23.07 | 33.53 | 35.27 | 23.22 |
| storage container           | 0.00  | 0.00  | 0.00  | 0.00  | 0.00  | 0.00  | 0.00  |
| scale                       | 20.62 | 10.30 | 10.56 | 17.90 | 17.23 | 27.05 | 24.43 |
| tissue box                  | 5.13  | 3.41  | 6.26  | 3.85  | 10.62 | 8.94  | 9.26  |
| light switch                | 0.00  | 0.00  | 0.00  | 0.00  | 0.00  | 0.00  | 0.00  |
| crate                       | 0.00  | 0.00  | 0.00  | 0.00  | 0.00  | 0.00  | 0.00  |
| power outlet                | 0.00  | 0.00  | 0.00  | 0.00  | 0.00  | 0.00  | 0.00  |
| decoration                  | 31.19 | 1.07  | 1.63  | 3.03  | 9.60  | 18.18 | 8.42  |
| sign                        | 7.07  | 6.81  | 6.73  | 8.14  | 5.76  | 5.09  | 0.05  |
| projector                   | 2.13  | 5.28  | 6.09  | 0.00  | 12.94 | 0.00  | 18.45 |
| closet door                 | 13.78 | 6.13  | 6.91  | 7.68  | 15.33 | 9.57  | 13.27 |
| vacuum cleaner              | 27.05 | 57.37 | 43.79 | 55.23 | 65.48 | 79.14 | 51.90 |
| candle                      | 0.00  | 0.00  | 0.00  | 0.00  | 0.00  | 0.00  | 0.00  |
| plunger                     | 24.08 | 32.55 | 39.71 | 30.40 | 28.56 | 38.44 | 26.17 |
| stuffed animal              | 0.00  | 0.00  | 0.00  | 0.00  | 0.00  | 0.00  | 0.00  |
| headphones                  | 0.00  | 14.79 | 0.16  | 0.00  | 0.00  | 0.00  | 5.50  |
| dish rack                   | 52.57 | 51.98 | 41.78 | 44.19 | 59.29 | 72.73 | 68.41 |
| broom                       | 1.07  | 3.24  | 4.84  | 1.47  | 0.38  | 1.64  | 2.76  |
| guitar case                 | 0.00  | 0.00  | 0.00  | 0.00  | 0.00  | 0.00  | 0.00  |
| range hood                  | 74.72 | 73.60 | 74.91 | 74.28 | 69.66 | 75.41 | 66.40 |
| dustpan                     | 0.54  | 0.00  | 1.46  | 3.90  | 9.26  | 0.18  | 1.78  |
| hair dryer                  | 0.00  | 0.00  | 0.67  | 0.00  | 2.16  | 0.00  | 18.91 |
| water bottle                | 0.00  | 0.00  | 0.00  | 0.00  | 0.00  | 0.00  | 0.00  |
| handicap bar                | 4.91  | 5.24  | 2.52  | 4.78  | 3.54  | 1.23  | 4.11  |
| purse                       | 0.00  | 0.00  | 0.00  | 0.00  | 0.00  | 0.00  | 0.00  |
| vent                        | 0.00  | 0.00  | 1.45  | 2.00  | 27.51 | 0.00  | 15.94 |
| shower floor                | 55.41 | 18.08 | 61.75 | 75.50 | 45.89 | 61.17 | 73.29 |
| water pitcher               | 0.00  | 0.00  | 0.00  | 0.00  | 0.00  | 0.00  | 0.00  |
| mailbox                     | 32.32 | 34.76 | 30.79 | 37.72 | 37.64 | 32.82 | 42.72 |
| bowl                        | 0.00  | 1.43  | 0.00  | 0.60  | 1.45  | 0.00  | 0.00  |
| paper bag                   | 0.11  | 5.37  | 3.51  | 2.05  | 1.43  | 2.30  | 1.91  |
| alarm clock                 | 0.00  | 0.00  | 0.00  | 0.00  | 0.00  | 0.00  | 0.00  |
| music stand                 | 0.00  | 0.00  | 0.00  | 0.00  | 0.00  | 0.00  | 0.00  |
| projector screen            | 2.81  | 1.60  | 2.01  | 5.81  | 0.00  | 0.25  | 0.00  |
| divider                     | 40.84 | 35.55 | 49.48 | 43.32 | 47.47 | 46.25 | 53.51 |
| laundry detergent           | 23.42 | 8.32  | 0.00  | 13.09 | 0.00  | 0.61  | 1.13  |
| bathroom counter            | 10.11 | 16.16 | 17.86 | 6.25  | 20.45 | 22.25 | 33.43 |
| object                      | 3.11  | 3.32  | 4.08  | 4.75  | 5.67  | 5.11  | 5.11  |
| bathroom vanity             | 35.99 | 40.17 | 40.87 | 40.70 | 41.05 | 50.54 | 41.94 |
| closet wall                 | 11.00 | 10.64 | 12.36 | 14.75 | 12.48 | 8.33  | 10.74 |
| laundry hamper              | 10.45 | 0.85  | 16.47 | 8.97  | 6.63  | 19.14 | 23.61 |
| bathroom stall door         | 59.08 | 42.73 | 58.54 | 55.43 | 46.60 | 63.83 | 58.87 |
| ceiling light               | 42.51 | 39.06 | 38.76 | 41.53 | 47.09 | 49.92 | 36.99 |
| trash bin                   | 33.77 | 41.67 | 33.78 | 35.63 | 37.82 | 39.60 | 36.98 |
| dumbbell                    | 21.47 | 33.23 | 27.16 | 47.20 | 57.58 | 74.11 | 6.59  |
| stair rail                  | 18.04 | 23.58 | 16.66 | 18.39 | 15.34 | 15.69 | 21.16 |
| tube                        | 3.23  | 0.07  | 6.99  | 0.00  | 0.19  | 0.00  | 4.54  |
| bathroom cabinet            | 21.93 | 24.86 | 23.99 | 14.25 | 26.37 | 18.87 | 33.12 |
| cd case                     | 0.00  | 0.00  | 0.00  | 0.00  | 0.00  | 0.00  | 0.00  |
| closet rod                  | 25.83 | 8.50  | 17.37 | 19.48 | 29.02 | 32.16 | 19.81 |
| coffee kettle               | 0.33  | 0.15  | 4.56  | 0.17  | 14.36 | 0.00  | 35.60 |
| structure                   | 0.00  | 0.00  | 0.00  | 0.00  | 0.00  | 0.00  | 0.00  |
| shower head                 | 0.00  | 20.40 | 11.80 | 0.00  | 14.06 | 0.11  | 27.80 |
| keyboard piano              | 0.00  | 0.00  | 0.00  | 0.15  | 0.00  | 0.00  | 0.01  |
| case of water bottles       | 0.00  | 0.00  | 0.00  | 0.44  | 0.00  | 0.00  | 0.00  |
| coat rack                   | 0.00  | 0.00  | 0.00  | 0.00  | 0.00  | 3.62  | 0.00  |
| storage organizer           | 0.00  | 0.00  | 0.00  | 0.00  | 0.00  | 0.00  | 0.00  |
| folded chair                | 0.00  | 0.00  | 0.00  | 0.00  | 0.00  | 0.00  | 0.00  |
| fire alarm                  | 0.00  | 0.00  | 0.00  | 0.00  | 0.00  | 0.00  | 0.00  |
| power strip                 | 0.00  | 0.00  | 0.00  | 0.00  | 0.00  | 0.00  | 0.00  |
| calendar                    | 0.00  | 0.00  | 0.00  | 0.00  | 0.00  | 0.00  | 0.00  |
| poster                      | 0.00  | 0.00  | 0.00  | 0.00  | 0.00  | 0.00  | 0.00  |
| potted plant                | 24.20 | 21.10 | 85.25 | 15.78 | 28.75 | 46.78 | 75.46 |
| luggage                     | 0.00  | 0.00  | 0.00  | 0.00  | 0.00  | 0.00  | 0.00  |
| mattress                    | 0.02  | 0.00  | 0.00  | 0.06  | 1.25  | 0.00  | 0.00  |

Table 6: Class IoU scores on the ScanNet200 benchmark of our proposed method, and compared with other state-of-the-art approaches.
